# Supplementary material for: A population dynamics tipping point for aging as a cause of adult death
Source: Research Square preprint supplement (doi:10.21203/rs.3.rs-478176/v1), 2021-09-23
Supplement: Supplementary file 2 [file 32260c5c1b0774eef132a947.xlsx]

## Sheet: Supplemental Table 3
		Supplemental Table 3. Output file of a single simulated worm.
		age1	stage2	body mass3	bacteria concentration4	bacteria	mass change6	cost of living7 [ng]	mass-eggs	Number
				[ng]	[mg/ml]	ingest5 [ng]	[ng]		laid8	eggs laid9
									[ng]
		1	E	65	27	0	0	0	0	0
		2	E	65	27	0	0	0	0	0
		3	E	65	27	0	0	0	0	0
		4	E	65	27	0	0	0	0	0
		5	L	78	27	19	13	3	0	0
		6	L	95	27	23	17	3	0	0
		7	L	114	27	28	19	4	0	0
		8	L	137	27	33	23	5	0	0
		9	L	165	27	40	28	6	0	0
		10	L	199	27	48	34	7	0	0
		11	L	239	27	58	40	8	0	0
		12	L	287	27	69	48	10	0	0
		13	L	345	27	82	58	12	0	0
		14	L	413	27	98	68	14	0	0
		15	L	494	27	116	81	17	0	0
		16	L	590	27	138	96	21	0	0
		17	L	703	27	162	113	25	0	0
		18	L	834	27	191	131	29	0	0
		19	L	987	27	222	153	35	0	0
		20	L	1164	27	258	177	41	0	0
		21	L	1367	27	296	203	48	0	0
		22	L	1596	27	338	229	56	0	0
		23	L	1853	27	381	257	65	0	0
		24	L	2137	27	425	284	75	0	0
		25	A	2446	27	468	309	86	0	0
		26	A	2779	27	514	333	97	0	0
		27	A	3128	27	559	349	109	0	0
		28	A	3489	27	595	361	122	0	0
		29	A	3853	27	619	364	135	0	0
		30	A	4213	27	643	360	147	65	1
		31	A	4560	27	656	347	160	0	0
		32	A	4887	27	662	327	171	65	1
		33	A	5188	27	677	301	182	65	1
		34	A	5462	27	679	274	191	130	2
		35	A	5705	27	669	243	200	65	1
		36	A	5918	27	649	213	207	130	2
		37	A	6099	27	643	181	213	130	2
		38	A	6249	27	654	150	219	130	2
		39	A	6374	27	644	125	223	130	2
		40	A	6476	27	640	102	227	195	3
		41	A	6559	27	628	83	230	195	3
		42	A	6629	27	635	70	232	195	3
		43	A	6685	27	637	56	234	195	3
		44	A	6729	27	633	44	236	195	3
		45	A	6764	27	632	35	237	260	4
		46	A	6791	27	632	27	238	195	3
		47	A	6812	27	631	21	238	260	4
		48	A	6828	27	626	16	239	195	3
		49	A	6841	27	625	13	239	260	4
		50	A	6856	27	625	15	240	195	3
		51	A	6869	27	619	13	240	260	4
		52	A	6880	27	612	11	241	195	3
		53	A	6888	27	604	8	241	195	3
		54	A	6895	27	599	7	241	260	4
		55	A	6903	27	586	8	242	195	3
		56	A	6910	27	576	7	242	195	3
		57	A	6914	27	569	4	242	195	3
		58	A	6925	27	559	11	242	195	3
		59	A	6934	27	552	9	243	130	2
		60	A	6941	27	542	7	243	195	3
		61	A	6949	27	526	8	243	130	2
		62	A	6958	27	514	9	244	195	3
		63	A	6963	27	507	5	244	130	2
		64	A	6970	27	493	7	244	130	2
		65	A	6977	27	478	7	244	130	2
		66	A	6986	27	478	9	245	130	2
		67	A	6997	27	461	11	245	130	2
		68	A	7004	27	455	7	245	65	1
		69	A	7011	27	444	7	245	130	2
		70	A	7017	27	434	6	246	65	1
		71	A	7024	27	422	7	246	65	1
		72	A	7028	27	416	4	246	130	2
		73	A	7034	27	405	6	246	65	1
		74	A	7042	27	402	8	246	65	1
		75	A	7049	27	395	7	247	65	1
		76	A	7056	27	386	7	247	65	1
		77	A	7062	27	378	6	247	0	0
		78	A	7067	27	371	5	247	65	1
		79	A	7071	27	366	4	247	65	1
		80	A	7075	27	360	4	248	0	0
		81	A	7077	27	354	2	248	65	1
		82	A	7082	27	356	5	248	0	0
		83	A	7086	27	350	4	248	65	1
		84	A	7089	27	346	3	248	0	0
		85	A	7091	27	341	2	248	65	1
		86	A	7094	27	337	3	248	0	0
		87	A	7096	27	333	2	248	0	0
		88	A	7096	27	330	0	248	65	1
		89	A	7096	27	326	0	248	0	0
		90	A	7100	27	329	4	249	0	0
		91	A	7102	27	326	2	249	0	0
		92	A	7104	27	323	2	249	65	1
		93	A	7105	27	320	1	249	0	0
		94	A	7106	27	318	1	249	0	0
		95	A	7105	27	315	-1	249	0	0
		96	A	7103	27	313	-2	249	0	0
		97	A	7103	27	312	0	249	0	0
		98	A	7106	27	316	3	249	0	0
		99	A	7106	27	312	0	249	65	1
		100	A	7108	27	312	2	249	0	0
		101	A	7107	27	310	-1	249	0	0
		102	A	7106	27	307	-1	249	0	0
		103	A	7103	27	306	-3	249	0	0
		104	A	7100	27	304	-3	249	0	0
		105	A	7096	27	302	-4	248	0	0
		106	A	7098	27	309	2	248	0	0
		107	A	7099	27	307	1	248	0	0
		108	A	7098	27	304	-1	248	0	0
		109	A	7096	27	304	-2	248	0	0
		110	A	7093	27	301	-3	248	0	0
		111	A	7088	27	299	-5	248	0	0
		112	A	7083	27	298	-5	248	0	0
		113	A	7076	27	295	-7	248	0	0
		114	A	7076	27	303	0	248	0	0
		115	A	7076	27	303	0	248	0	0
		116	A	7074	27	301	-2	248	0	0
		117	A	7072	27	300	-2	248	0	0
		118	A	7068	27	298	-4	247	0	0
		119	death:	7063
			old age
		1age, biological age of this worm in 3 hour time-steps.
		2stage, developmental stage of this worm, E = egg, L = larva, A = adult.
		3mass, body mass of this worm.
		4bacteria concentration, concentration of bacteria in the 5 ml simulated ecosystem – held constant at 27mg/ml in this simulation.
		5bacteria ingest, bacteria ingested by this worm; (bt(b>l) or bt(b>a)).
		6mass change, increase or decrease in body mass of this worm between time-steps.
		7cost of living, mass used for metabolism by this worm in each time step. See Note 2.
		8mass eggs laid, total mass of eggs laid by this worm in a time step. The mass of one egg is 65 ng.
		9Number eggs laid, number of eggs laid by this worm in a time step.
